# Supplementary material for: An open-framework manganese(ii) phosphite and its composite membranes with polyvinylidene fluoride exhibiting intrinsic water-assisted proton conductance
Source: Royal Society of Chemistry journal article supplement (doi:10.1039/c7dt01418j), 2017-01-01
Supplement: c7dt01418j1.pdf [file c7dt01418j1.pdf]

## Electronic supporting information

### **An open-framework manganese(II) phosphite and its composite membrane with polyvinylidene fluoride exhibiting intrinsic water-assisted proton conductance**

Mei Wang,<sup>a</sup> Hong-Bin Luo,<sup>a</sup> Jin Zhang,<sup>a</sup> Shao-Xian Liu,<sup>a</sup> Chen Xue,<sup>a</sup> Yang Zou,<sup>a</sup>  
Xiao-Ming Ren<sup>\*a,b,c</sup>

<sup>a</sup> State Key Laboratory of Materials-Oriented Chemical Engineering and College of Chemistry and Molecular Engineering, Nanjing Tech University, Nanjing 210009, P. R. China

<sup>b</sup>College of Materials Science and Engineering, Nanjing Tech University, Nanjing 210009, P. R. China

<sup>c</sup>State Key Laboratory of Coordination Chemistry, Nanjing University, Nanjing 210093, P. R. China

Fax: 86-25-58139481

Tel: 86-25-58139476

E-mail: [xmren@njtech.edu.cn](mailto:xmren@njtech.edu.cn)

## Contents

Figure S1: TG curves of **1**.

Figure S2: Water adsorption isotherms at 298 K of **1**.

Figure S3: Nyquist plots of **1** at 298 K with different relative humidity and humidity-dependent proton conductivity at 298 K.

Figure S4: Nyquist plots of **1** at selected temperature under anhydrous conditions.

Figure S5: Optical images of the pure PVDF membrane and the composite membranes of **1@PVDF-X** (X=10, 25, 40 and 55, respectively).

Figure S6: Optical images of **1@PVDF-55**

Figure S7: SEM images of (a, b) crystal particles **1** (c, d) pure PVDF (e, f) **1@PVDF-10** (g, h) **1@PVDF-25** (i, j) **1@PVDF-40**.

Figure S8: Nyquist plots of **1@PVDF-10** (a, b), **1@PVDF-25** (c, d) and **1@PVDF-40** (e, f) in water at selected temperatures.

Figure S9: Time-dependent Nyquist plots of **1@PVDF-55** measured at 336 K in water.

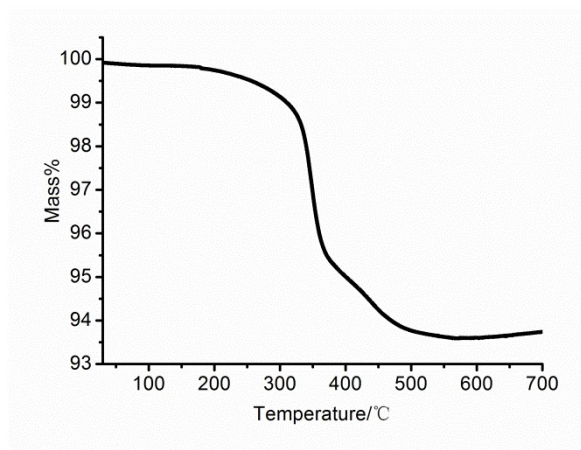

Figure S1: TG curves of 1.

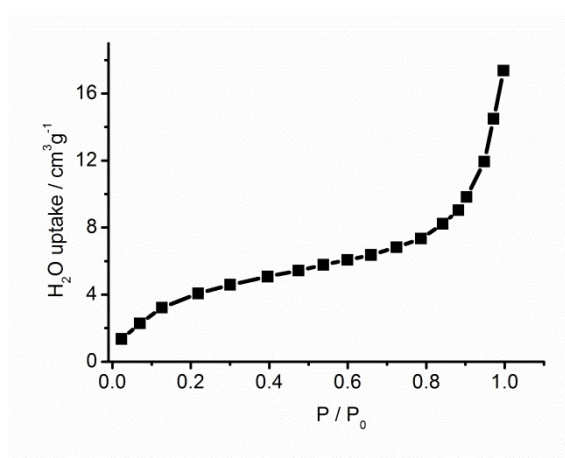

Figure S2: Water adsorption isotherms at 298 K of 1.

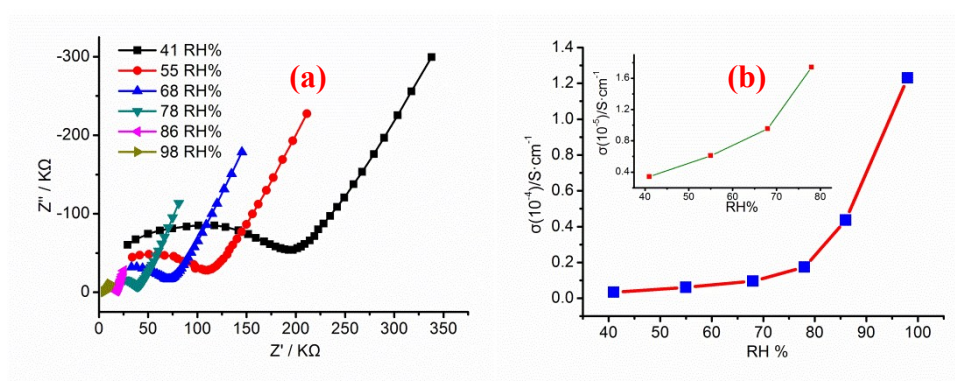

FigureS3:(a) Nyquist plots of 1at 298 K with different relative humidity and (b) humidity-dependent proton conductivity at 298 K.

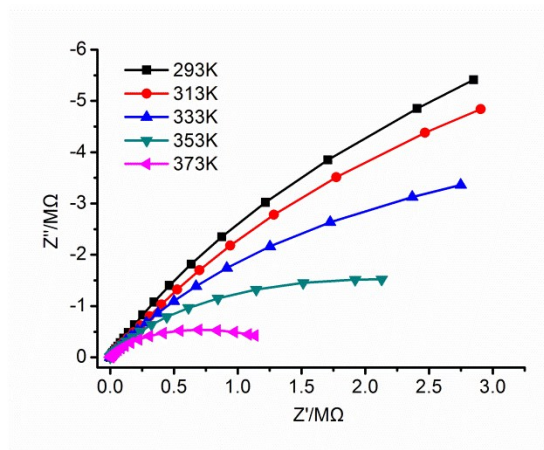

Figure S4: Nyquist plots of 1at selected temperature under anhydrous conditions.

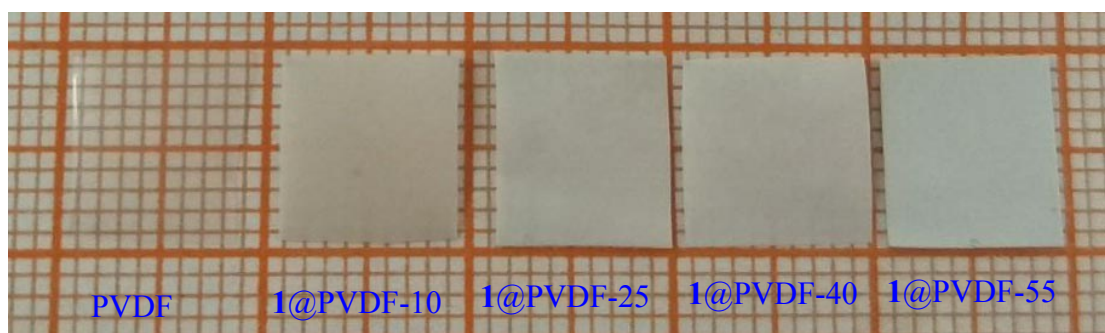

Figure S5: Optical images of the pure PVDF membrane and the composite membranes of 1@PVDF-X (X=10, 25, 40 and 55, respectively).

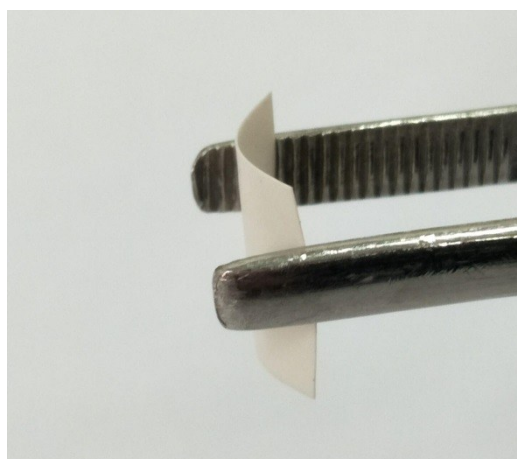

Figure S6: Optical images of 1@PVDF-55

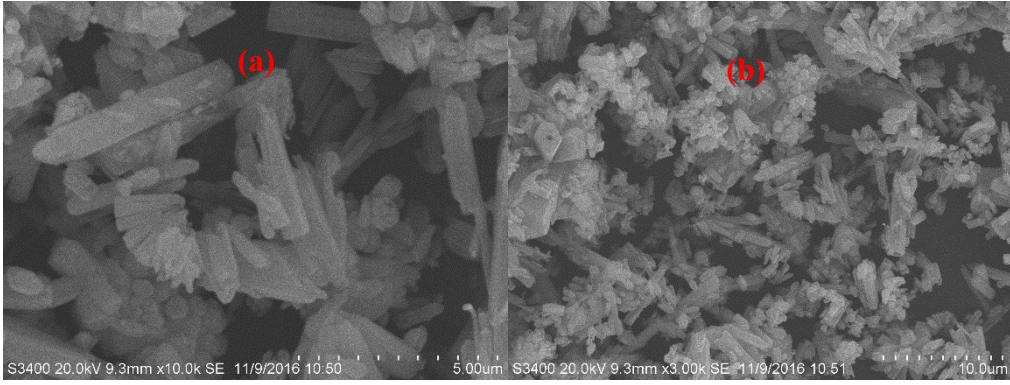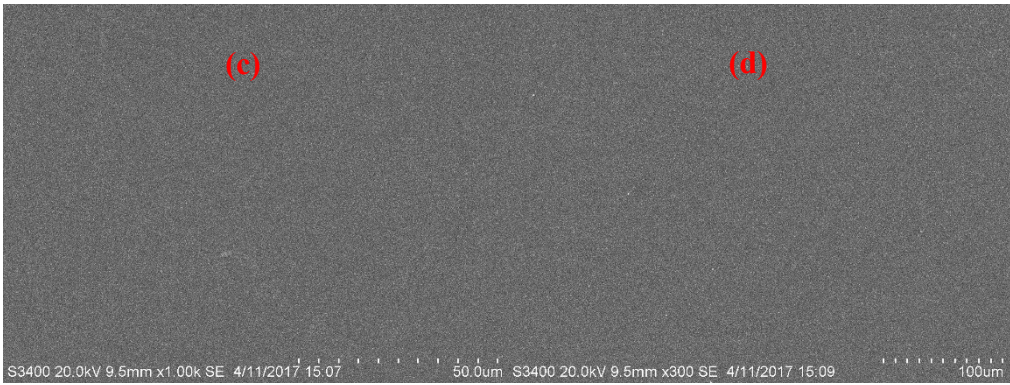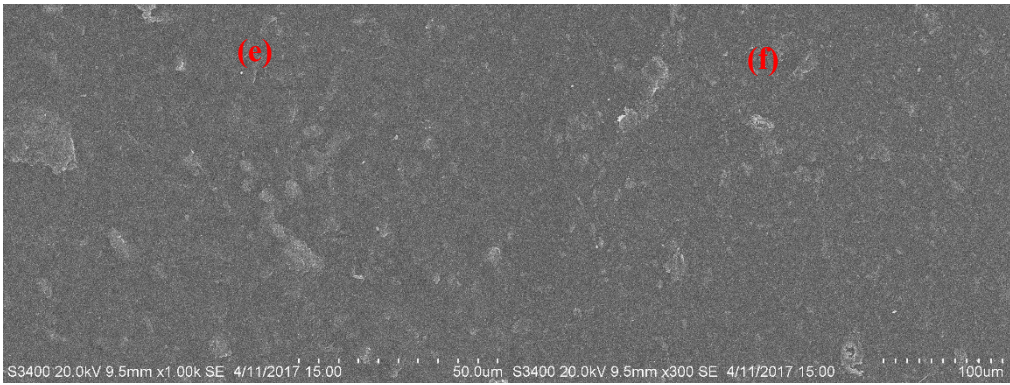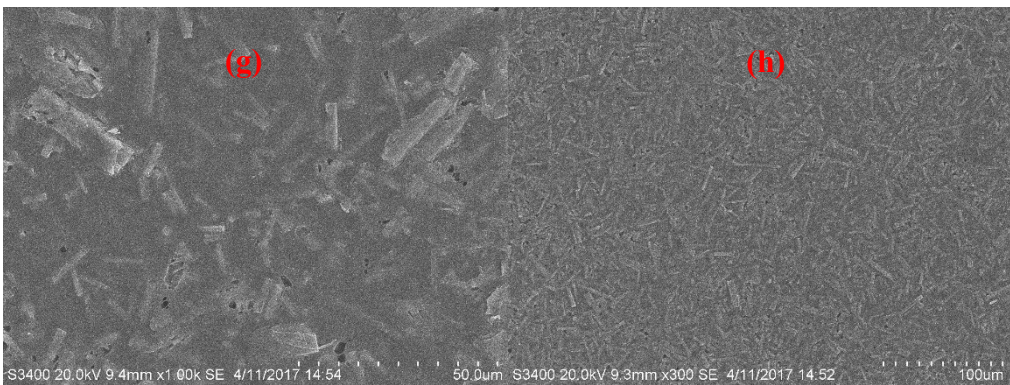

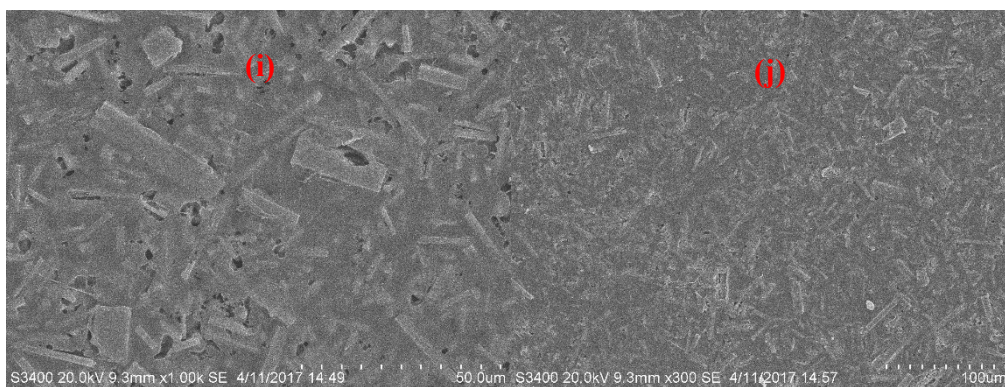

Figure S7: SEM images of (a, b) crystal particles **1** (c, d) pure PVDF (e, f) **1**@PVDF-10 (g, h) **1**@PVDF-25 (i, j) **1**@PVDF-40.

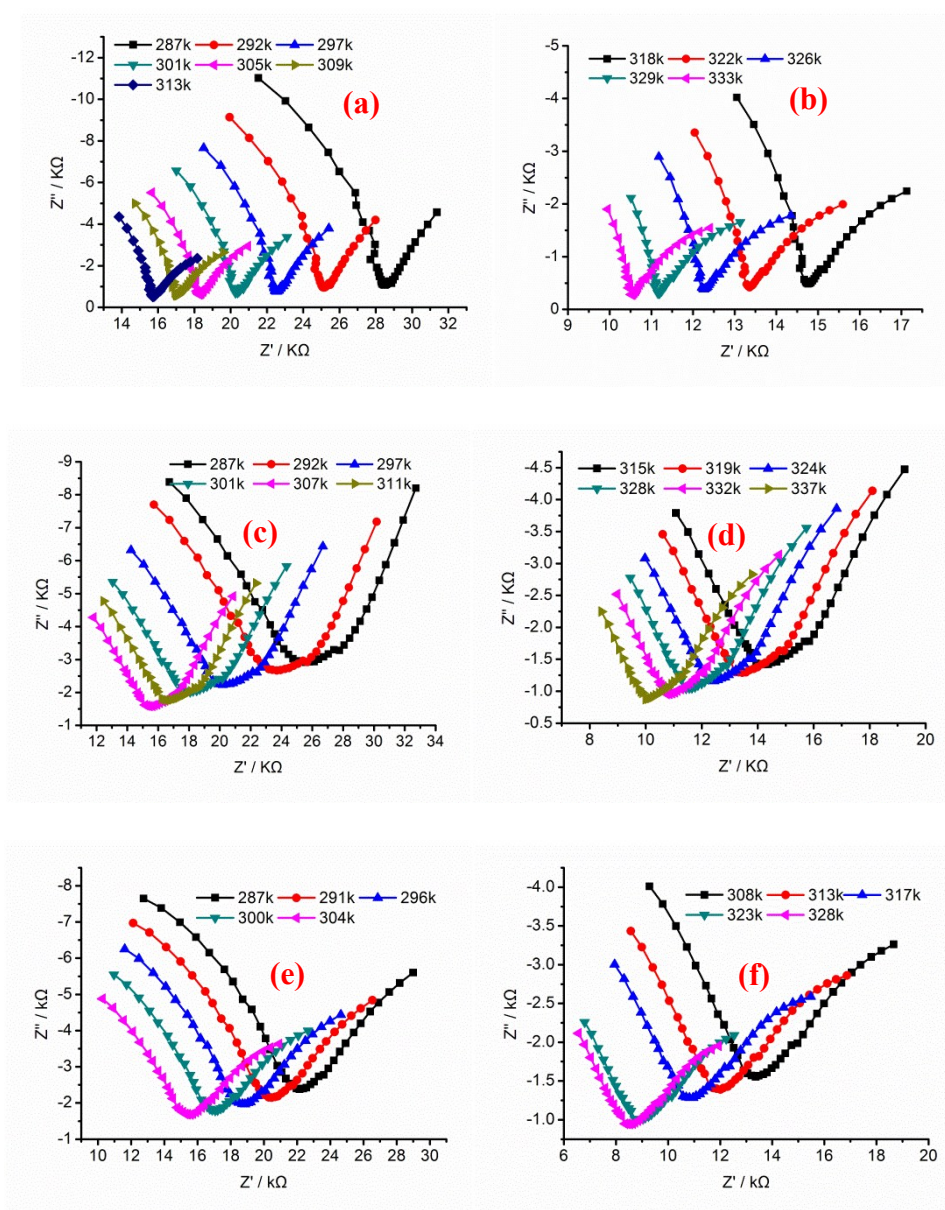

Figure S8: Nyquist plots of **1**@PVDF-10 (a, b), **1**@PVDF-25 (c, d) and **1**@PVDF-40

(e, f) in water at selected temperatures.

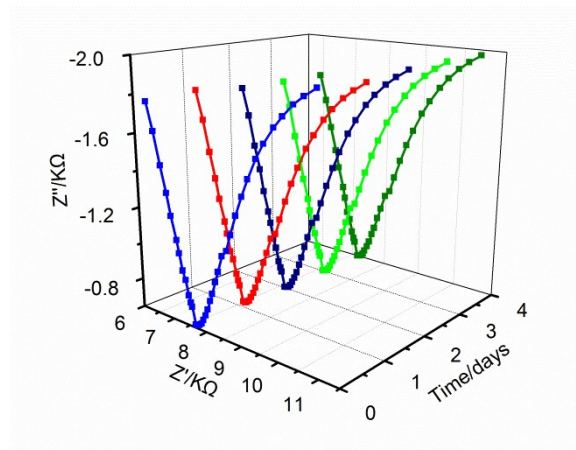

FigureS9: Time-dependent Nyquist plots of 1@PVDF-55 measured at 336 K in water.
